# Supplementary material for: Characterization of pre-mRNA Splicing Defects Caused by CLCN5 and OCRL Mutations and Identification of Novel Variants Associated with Dent Disease
Source: MDPI journal article supplement (doi:10.3390/biomedicines11113082), 2023-11-17
Supplement: s1 [file s1]

**Table S1. Primers used in construction of minigenes and site-directed mutagenesis.**

| Exons               | Forward primer (5'-3')                       | Reverse primer (5'-3')                      |
|---------------------|----------------------------------------------|---------------------------------------------|
| CLCN5-Ex3           | TTTACTCGAGGGTAAACCTCAAAGTTGTTAGTG            | TATAGGATCCGGTAGAAAAACAGGAAAACACAG           |
| CLCN5-Ex7           | TTTTCTCGAGACCTGGTCAAGCATGTGAAC               | TATAGGATCCGTAAAGCACCAAGTTGGGGAG             |
| CLCN5-Ex9           | ATATACTCGAGCCTTTACAGCCACTTGCTAGCATA          | TTTTGGATCCTTTCCTCATCTGTATACCAGATGC          |
| CLCN5-Ex10,11       | AATCTCGAGATCGTCTCCATTGTG                     | ATGGGCTCTAGACTATCCACTTTCATC                 |
| OCRL-Ex11,12        | TAAACTCGAGAGTTTCCACTTGACGGGGTC               | ATAAGGATCCACCCTCTCCTTTGTGACCCC              |
| OCRL-Ex15           | AAACTCGAGAGTACACGGTTCTTTGGGAGC               | ATTATCTAGATCTCCCTCCTGGTGTTTCCC              |
| Mutagenesis-p.G261R | CTTTGGAGCACCTATAGGTAGAGTATTATTCAGCCTTG-      | TCAAGGCTGAATAATACTCTACCTATAGGTGCTCCAAAG     |
| Mutagenesis-p.E267A | GTGGAGTATTATTCAGCCTTGCAGAGGTAACAACTTTTTCATTG | CAATGAAAAGTTGTTACCTCTGCAAGGCTGAATAATACTCCAC |
| Mutagenesis-p.G462S | TTATCCCTAGCATGGCTGTTAGTGCTATAGCAGGT          | ACCTGCTATAGCACTAACAGCCATGCTAGGGATAA         |
| Mutagenesis-p.M504K | CCCCCGGCCTTTATGCAAAGGTTGGGGCTG               | GCTGCAGCCCTAACCATTGCATAAAGGCCG              |
| Mutagenesis-p.G506R | CGGCCTTTATGCAATGGTTAGGGCTGCAGC               | GCTGCAGCCCTAACCATTGCATAAAGGCCG              |
| Mutagenesis-p.G506E | CCTTTATGCAATGGTTGAGGCTGCAGCCTGCTTAG          | CTAAGCAGGCTGCAGCCTCAACCATTGCATAAAGG         |
| Mutagenesis-p.G506E | CCTTTATGCAATGGTTGAGGCTGCAGCCTGCTTAG          | CTAAGCAGGCTGCAGCCTCAACCATTGCATAAAGG         |
| Mutagenesis-p.G512R | GGCTGCAGCCTGCTTACGTGAGTAGTGTTC               | GCAAACACTACTCACGTAAGCAGGCTGCAGCC            |
| Mutagenesis-p.G512D | TGTCTATTTCTTTGCAGATGGGGTGACTCGGATG           | CATCCGAGTCACCCCATCTGCAAAGAAATAGACA          |
| Mutagenesis-p.W547R | GAGCATCTGCCACCCGCTTGCTTGTCATGGC              | GCCATGACAAGCAAGCGGGTGGCAGATGCT              |

**Table S2. Bioinformatics analysis of novel *CLCN5* and *OCRL* mutations identified in our study.**

| Gene         | Mutation                       | Distance from SS <sup>a</sup> | ACMG Classification (VarSome)  | Effect on protein |                         |                     | Effect on splicing |                          |                           |                               | ORF changes |
|--------------|--------------------------------|-------------------------------|--------------------------------|-------------------|-------------------------|---------------------|--------------------|--------------------------|---------------------------|-------------------------------|-------------|
|              |                                |                               |                                | SIFT (score)      | Polyphen2 (score)       | MutPred2 (score)    | SPANR PSI          | CADD-splice <sup>b</sup> | Human Splicing Finder     | SpliceAI <sup>c</sup> (score) |             |
| <i>CLCN5</i> | c.1560_1561delTC (p.L521Cfs*6) | +27                           | Pathogenic (10 pts)            | --                | --                      | --                  | --                 | --                       | --                        | No effect (<0,2)              | Yes         |
| <i>CLCN5</i> | c.1641G>T (p.W547C)            | +107                          | Likely pathogenic (8 pts)      | Damaging (0.00)   | Likely Damaging (1.000) | Deleterious (0.942) | ↑                  | 29.2                     | New donor ss              | No effect (<0,2)              | Yes         |
| <i>CLCN5</i> | c.976G>C (p.G326R)             | +172                          | Uncertain significance (5 pts) | Damaging (0.00)   | Likely Damaging (1.000) | Deleterious (0.966) | ↑                  | 25.9                     | No splicing impact        | No effect (<0,2)              | --          |
| <i>CLCN5</i> | c.966delC (p.F322Lfs*37)       | +162                          | Pathogenic (10 pts)            | --                | --                      | --                  | --                 | --                       | --                        | No effect (<0,2)              | Yes         |
| <i>CLCN5</i> | c.1600T>A (p.Y534N)            | +66                           | Likely pathogenic (6 pts)      | Damaging (0.00)   | Likely Damaging (1.000) | Deleterious (0.918) | ↓                  | 25.7                     | No splicing impact        | No effect (<0,2)              | --          |
| <i>CLCN5</i> | c.2026delA (p.T676Lfs*2)       | +93                           | Pathogenic (10 pts)            | --                | --                      | --                  | --                 | --                       | --                        | No effect (<0,2)              | Yes         |
| <i>OCRL</i>  | c.1056+1G>A                    | +1                            | --                             | --                | --                      | --                  | ↓                  | --                       | Donor site inactivated    | Donor site loss (0,99)        | No          |
| <i>OCRL</i>  | c.1467-1G>A                    | -1                            | --                             | --                | --                      | --                  | ↓                  | --                       | Acceptor site inactivated | Acceptor site loss (0,99)     | Yes         |

ESE, Exonic Splicing Enhancer; ESS, Exonic Splicing Silencer; (--) Not determined; PSI, Percentage of transcripts with the exon spliced in. ↑, higher the percentage of transcripts with the exon spliced in. ↓, lower the percentage of transcripts with the exon spliced in. n

<sup>a</sup> Position in relation to the acceptor (+) or donor (-) splice site (SS).

<sup>b</sup> CADD-splice score equal or higher than 20 indicates that the variant is damaging.

<sup>c</sup> SpliceAI scores range from 0 to 1 and represent the probability that the variant affects splicing. Scores ≥ 0,2 (low); ≥ 0,5 (recommended); ≥ 0,8 (high precision). Only specific scores higher than 0.2 are shown.

**Table S3. Bioinformatics analysis of *CLCN5* missense mutations for their potential effect on pre-mRNA splicing.**

| Exon | Amino acid change | Nucleotide change | cDNA change | Codon number | Distance from splice site <sup>a</sup> | Coordinate        | Bioinformatics tools               |           |                                           |                      |                      |
|------|-------------------|-------------------|-------------|--------------|----------------------------------------|-------------------|------------------------------------|-----------|-------------------------------------------|----------------------|----------------------|
|      |                   |                   |             |              |                                        |                   | MutPredSplice <sup>b</sup> (score) | SPANR     | Human Splicing Finder                     |                      |                      |
| 3    | p.G57V            | c.170G>T          | GGC-GTC     | 57           | -36                                    | chr23:49837208G>T | SNV (0.42)                         | No effect | New Donor site                            | New ESS Site         | ESE site inactivated |
| 3    | p.W58L            | c.173G>C          | TGG-TGC     | 58           | -33                                    | chr23:49837211G>C | SNV (0.3)                          | No effect | ESE Site inactivated                      |                      |                      |
| 3    | p.W58C            | c.174G>C          | TGG-TTG     | 58           | -32                                    | chr23:49837212G>C | SNV (0.23)                         | No effect | No significant splicing motif alteration. |                      |                      |
| 3    | p.G65R            | c.193G>A          | GGG-AGG     | 65           | -13                                    | chr23:49837231G>A | SAV (0.76)                         | Affects   | New Acceptor site                         |                      |                      |
| 4    | p.G88D            | c.263G>A          | GGT-GAT     | 88           | +58                                    | chr23:49840507G>A | SNV (0.26)                         | No effect | No significant splicing motif alteration. |                      |                      |
| 4    | p.G88V            | c.263G>T          | GGT-GTT     | 88           | +58                                    | chr23:49840507G>T | SNV (0.36)                         | No effect | New Donor Site                            | New ESS Site         |                      |
| 4    | p.C90W            | c.270C>G          | TGC-TGG     | 90           | +65                                    | chr23:49840514C>G | SNV (0.13)                         | No effect | No significant splicing motif alteration. |                      |                      |
| 6    | p.I176N           | c.527T>A          | ATC-AAC     | 176          | +11                                    | chr23:49846308T>A | SNV (0.32)                         | No effect | No significant splicing motif alteration. |                      |                      |
| 6    | p.G179D           | c.536G>A          | GGT-GAT     | 179          | +20                                    | chr23:49846317G>A | SNV (0.44)                         | No effect | New Donor Site                            | ESE Site inactivated |                      |
| 6    | p.C219R           | c.655T>C          | TGC-CGC     | 219          | -69                                    | chr23:49846436T>C | SNV (0.18)                         | No effect | ESE Site Broken                           |                      |                      |
| 6    | p.C221R           | c.661T>C          | TGT-CGT     | 221          | -63                                    | chr23:49846442T>C | SNV (0.21)                         | No effect | ESE Site inactivated                      |                      |                      |
| 6    | p.L225P           | c.674T>C          | CTG-CCG     | 225          | -50                                    | chr23:49846455T>C | SNV (0.21)                         | No effect | ESE Site inactivated                      |                      |                      |
| 6    | p.K231I           | c.692A>T          | AAA-ATA     | 231          | -32                                    | chr23:49846473A>T | SNV (0.47)                         | No effect | ESE Site inactivated                      |                      |                      |
| 6    | pR239P            | c.716G>C          | CGC-CCC     | 239          | -8                                     | chr23:49846497G>C | SNV (0.47)                         | No effect | ESE Site inactivated                      |                      |                      |

Table S3. Continuation

| Exon | Amino acid change | Nucleotide change | cDNA change | Codon number | Distance from splice site <sup>a</sup> | Coordinate        | Bioinformatics tools               |           |                                           |                      |                      |  |
|------|-------------------|-------------------|-------------|--------------|----------------------------------------|-------------------|------------------------------------|-----------|-------------------------------------------|----------------------|----------------------|--|
|      |                   |                   |             |              |                                        |                   | MutPredSplice <sup>b</sup> (score) | SPANR     | Human Splicing Finder                     |                      |                      |  |
| 7    | p.S244L           | c.731C>T          | TCG-TTG     | 244          | +8                                     | chr23:49850644C>T | SNV (0.34)                         | Affects   | New ESS Site                              |                      |                      |  |
| 7    | p.G250R           | c.748G>C          | GGT-CGT     | 250          | +25                                    | chr23:49850661G>C | SNV (0.33)                         | No effect | ESE Site inactivated                      |                      |                      |  |
| 7    | p.G260V           | c.779G>T          | GGT-GTT     | 260          | +26                                    | chr23:49850692G>T | SNV (0.34)                         | No effect | New Donor Site                            | New ESS Site         | ESE Site inactivated |  |
| 7    | p.G261R           | c.781G>A          | GGA-AGA     | 261          | -24                                    | chr23:49850694G>A | SAV (0.93)                         | Affects   | New ESS Site                              | ESE Site inactivated |                      |  |
| 7    | p.L263F           | c.789A>T          | TTA-TTT     | 263          | -16                                    | chr23:49850702A>T | SNV (0.37)                         | Affects   | No significant splicing motif alteration. |                      |                      |  |
| 7    | p.S265R           | c.793A>C          | AGC-CGC     | 265          | -12                                    | chr23:49850706A>C | SNV (0.47)                         | No effect | ESE Site inactivated                      |                      |                      |  |
| 7    | p.L266V           | c.796C>G          | CTT-GTT     | 266          | -9                                     | chr23:49850709C>G | SNV (0.36)                         | No effect | ESE Site inactivated                      |                      |                      |  |
| 7    | p.Q267A           | c.800A>C          | GAA-GCA     | 267          | -5                                     | chr23:49850713A>C | SNV (0.44)                         | Affects   | New ESS Site                              | ESE Site inactivated |                      |  |
| 7    | p.Q267D           | c.801A>C          | GAA-GAC     | 267          | -4                                     | chr23:49850714A>C | SNV (0.49)                         | No effect | ESE Site inactivated                      |                      |                      |  |
| 8    | p.S270R           | c.808A>C          | AGC-CGC     | 270          | +4                                     | chr23:49850988A>C | SAV (0.63)                         | No effect | No significant splicing motif alteration. |                      |                      |  |
| 8    | p.S270G           | c.808A>G          | AGC-GGC     | 270          | +4                                     | chr23:49850988A>G | SAV (0.66)                         | No effect | No significant splicing motif alteration. |                      |                      |  |
| 8    | p.S270R           | c.810C>G          | AGC-AGG     | 270          | +6                                     | chr23:49850990C>G | SNV (0.49)                         | No effect | ESE Site inactivated                      |                      |                      |  |
| 8    | p.Y272N           | c.814T>A          | TAT-AAT     | 272          | +10                                    | chr23:49850994T>A | SNV (0.29)                         | No effect | No significant splicing motif alteration. |                      |                      |  |
| 8    | p.Y272C           | c.815A>G          | TAT-TGT     | 272          | +11                                    | chr23:49850995A>G | SNV (0.35)                         | No effect | No significant splicing motif alteration. |                      |                      |  |
| 8    | p.F273L           | c.817T>C          | TTT-CTT     | 273          | +13                                    | chr23:49850997T>C | SNV (0.27)                         | No effect | No significant splicing motif alteration. |                      |                      |  |

Table S3. Continuation

| Exon | Amino acid change | Nucleotide change | cDNA change | Codon number | Distance from splice site <sup>a</sup> | Coordinate        | Bioinformatics tools               |           |                                          |              |                      |
|------|-------------------|-------------------|-------------|--------------|----------------------------------------|-------------------|------------------------------------|-----------|------------------------------------------|--------------|----------------------|
|      |                   |                   |             |              |                                        |                   | MutPredSplice <sup>b</sup> (score) | SPANR     | Human Splicing Finder                    |              |                      |
| 8    | p.L278W           | c.833T>G          | TTG-TGG     | 278          | +29                                    | chr23:49851013T>G | SNV (0.30)                         | No effect | New Donor Site                           | New ESS Site | ESE Site inactivated |
| 8    | p.L278S           | c.833T>C          | TTG-TCG     | 278          | +29                                    | chr23:49851013T>C | SNV (0.14)                         | No effect | ESE Site inactivated                     |              |                      |
| 8    | p.L278F           | c.834G>C          | TTG-TTC     | 278          | +30                                    | chr23:49851014G>C | SNV (0.13)                         | No effect | ESE Site inactivated                     |              |                      |
| 8    | p.R280P           | c.839G>C          | CGT-CCT     | 280          | +35                                    | chr23:49851019G>C | SNV (0.14)                         | No effect | New ESS Site                             |              |                      |
| 9    | p.G462S           | c.1384G>A         | GGT-AGT     | 462          | +37                                    | chr23:49853391G>A | SAV (0.62)                         | No effect | New Acceptor site / Donor Site           |              |                      |
| 9    | p.G462D           | c.1385G>A         | GGT-GAT     | 462          | +38                                    | chr23:49853392G>A | SNV (0.39)                         | No effect | No significant splicing motif alteration |              |                      |
| 9    | p.G462V           | c.1385G>T         | GGT-GTT     | 462          | +38                                    | chr23:49853392G>T | SNV (0.25)                         | No effect | New ESS Site                             |              |                      |
| 9    | p.G466R           | c.1396G>C         | GGT-CGT     | 466          | +49                                    | chr23:49853403G>C | SNV (0.24)                         | No effect | No significant splicing motif alteration |              |                      |
| 9    | p.G466D           | c.1397G>A         | GGT-GAT     | 466          | +50                                    | chr23:49853404G>A | SNV (0.20)                         | No effect | No significant splicing motif alteration |              |                      |
| 9    | p.L468P           | c.1403T>C         | CTT-CCT     | 468          | +56                                    | chr23:49853410T>C | SNV (0.12)                         | No effect | No significant splicing motif alteration |              |                      |
| 9    | p.L469P           | c.1406T>C         | CTA-CCA     | 469          | +59                                    | chr23:49853413T>C | SNV (0.12)                         | No effect | New ESS Site                             |              |                      |
| 9    | p.G470R           | c.1408G>A         | GGA-AGA     | 470          | +61                                    | chr23:49853415G>A | SNV (0.43)                         | No effect | No significant splicing motif alteration |              |                      |
| 9    | p.Y502C           | c.1505A>G         | TAT-TGT     | 502          | -30                                    | chr23:49853512A>G | SNV (0.18)                         | No effect | ESE Site inactivated                     |              |                      |
| 9    | p.M504K           | c.1511T>A         | ATG-AAG     | 504          | -24                                    | chr23:49853518T>A | SAV (0.70)                         | No effect | New Acceptor site / Donor Site           |              |                      |
| 9    | p.V505G           | c.1514T>G         | GTT-GGT     | 505          | -21                                    | chr23:49853521T>G | SNV (0.38)                         | No effect | New Donor Site                           |              |                      |
| 9    | p.G506R           | c.1516G>A         | GGG-AGG     | 506          | -19                                    | chr23:49853523G>A | SAV (0.67)                         | No effect | New Acceptor site / Donor Site           |              |                      |

Table S3. Continuation

| Exon | Amino acid change | Nucleotide change | cDNA change | Codon number | Distance from splice site <sup>a</sup> | Coordinate        | Bioinformatics tools               |           |                                          |
|------|-------------------|-------------------|-------------|--------------|----------------------------------------|-------------------|------------------------------------|-----------|------------------------------------------|
|      |                   |                   |             |              |                                        |                   | MutPredSplice <sup>b</sup> (score) | SPANR     | Human Splicing Finder                    |
| 9    | p.G506Q           | c.1517G>A         | GGG-GAG     | 506          | -18                                    | chr23:49853524G>A | SNV (0.24)                         | No effect | New acceptor Site                        |
| 9    | p.G512R           | c.1534G>C         | GGT-CGT     | 512          | -1                                     | chr23:49853541G>C | SAV (0.80)                         | No effect | Donor Site inactivated                   |
| 10   | p.G512D           | c.1535G>A         | GGT-GAT     | 512          | +1                                     | chr23:49854773G>A | SAV (0.81)                         | No effect | No significant splicing motif alteration |
| 10   | p.G513R           | c.1537G>A         | GGG-AGG     | 513          | +3                                     | chr23:49854775G>A | SAV (0.80)                         | No effect | New Acceptor site                        |
| 10   | p.G513Q           | c.1538G>A         | GGG-GAG     | 513          | +4                                     | chr23:49854776G>A | SAV (0.84)                         | No effect | New Acceptor site / New Donor site       |
| 10   | p.R516W           | c.1546C>T         | CGG-TGG     | 516          | 12                                     | chr23:49854784C>T | SNV (0.26)                         | No effect | New ESS Site                             |
| 10   | p.R516Q           | c.1547G>A         | CGG-CAG     | 516          | 13                                     | chr23:49854785G>A | SNV (0.32)                         | No effect | New ESS Site                             |
| 10   | p.T518A           | c.1552A>G         | ACT-GCT     | 518          | 18                                     | chr23:49854790A>G | SNV (0.34)                         | No effect | New ESS Site<br>ESE Site inactivated     |
| 10   | p.V519D           | c.1556T>A         | GTT-GAT     | 519          | 22                                     | chr23:49854794T>A | SNV (0.26)                         | No effect | No significant splicing motif alteration |
| 10   | p.S520P           | c.1558T>C         | TCT-CCT     | 520          | 24                                     | chr23:49854796T>C | SNV (0.21)                         | No effect | No significant splicing motif alteration |
| 10   | p.L521F           | c.1561C>T         | CTT-TTT     | 521          | 27                                     | chr23:49854799C>T | SNV (0.37)                         | No effect | No significant splicing motif alteration |
| 10   | p.I524K           | c.1571T>A         | ATA-AAA     | 524          | 37                                     | chr23:49854809T>A | SNV (0.17)                         | No effect | No significant splicing motif alteration |
| 10   | p.Q527D           | c.1581A>T         | GAA-GAT     | 527          | 47                                     | chr23:49854819A>T | SNV (0.20)                         | No effect | ESE Site inactivated                     |
| 10   | p.W547R           | c.1639T>C         | TGG-CGG     | 547          | 105                                    | chr23:49854877T>C | SAV (0.81)                         | No effect | No significant splicing motif alteration |
| 11   | p.T657S           | c.1970C>G         | ACT-AGT     | 657          | 37                                     | chr23:49855363C>G | SNV (0.19)                         | No effect | No significant splicing motif alteration |

Table S3. Continuation

| Exon | Amino acid change | Nucleotide change | cDNA change | Codon number | Distance from splice site <sup>a</sup> | Coordinate        | Bioinformatics tools               |           |                                          |
|------|-------------------|-------------------|-------------|--------------|----------------------------------------|-------------------|------------------------------------|-----------|------------------------------------------|
|      |                   |                   |             |              |                                        |                   | MutPredSplice <sup>b</sup> (score) | SPANR     | Human Splicing Finder                    |
| 11   | p.F703S           | c.2108T>C         | TCC-CCC     | 703          | -43                                    | chr23:49855501T>C | SNV (0.11)                         | No effect | No significant splicing motif alteration |
| 11   | p.L706P           | c.2117T>C         | CTG-CCG     | 706          | -34                                    | chr23:49855510T>C | SNV (0.33)                         | No effect | ESE Site inactivated                     |
| 11   | p.C711W           | c.2133C>G         | TGC-TGG     | 711          | -18                                    | chr23:49855526C>G | SNV (0.17)                         | No effect | New ESS Site<br>ESE Site inactivated     |

Mutations were obtained from reference 38. ESE, Exonic Splicing Enhancer; ESS, Exonic Splicing Silencer; SNV, Splice Neutral Variant; SAV, Splice Affecting Variant

a. Position in relation to the acceptor (+) or donor (-) splice site.

b. The general score of MutPredSplice ranges from 0.0 and 1.0, with a higher score indicating a greater propensity to be pathogenic.

**Table S4. Bioinformatics predictions for *CLCN5* missense mutations selected from Table S3.**

| Exon | Mutation            | Distance from SS <sup>a</sup> | ACMG classification (VarSome)  | Effect on protein |                           |                     | Effect on splicing                  |           |                          |                                                 |                               |             |
|------|---------------------|-------------------------------|--------------------------------|-------------------|---------------------------|---------------------|-------------------------------------|-----------|--------------------------|-------------------------------------------------|-------------------------------|-------------|
|      |                     |                               |                                | SIFT (score)      | Polyphen2 (score)         | MutPred2 (score)    | MutPred Splice (score) <sup>b</sup> | SPANR PSI | CADD-splice <sup>c</sup> | Human Splicing Finder                           | SpliceAI (score) <sup>d</sup> | ORF changes |
| 3    | c.193G>A (p.G65R)   | -13                           | Uncertain significance (5 pts) | Damaging (0.00)   | Probably damaging (1.00)  | Deleterious (0.950) | SAV (0.76)                          | ↓         | 31                       | New acceptor ss                                 | No effect (<0,2)              | No          |
| 7    | c.731C>T (p.S244L)  | +8                            | Likely pathogenic (9 pts)      | Damaging (0.00)   | Probably damaging (0.986) | Deleterious (0.899) | SNV (0.34)                          | ↓         | 26.9                     | New ESS or ESE site<br>New acceptor or donor ss | 0,00                          | No          |
| 7    | c.781G>A (p.G261R)  | -24                           | Likely pathogenic (7 pts)      | Damaging (0.00)   | Probably damaging (1.00)  | Deleterious (0.958) | SAV (0.93)                          | ↓         | 33                       | New ESS or ESE site                             | Donor gain (0.55)             | No          |
| 7    | c.800A>C (p.E267A)  | -5                            | Likely pathogenic (8 pts)      | Damaging (0.00)   | Probably damaging (0.987) | Deleterious (0.910) | SNV (0.44)                          | ↓         | 27.9                     | New ESS or ESE and ESS or ESE site inactivated  | No effect (<0,2)              | No          |
| 9    | c.1384G>A (p.G462S) | +37                           | Likely pathogenic (9 pts)      | Damaging (0.00)   | Probably damaging (0.999) | Deleterious (0.950) | SAV (0.62)                          | ↓         | 27.2                     | New acceptor/donor ss                           | No effect (<0,2)              | No          |
| 9    | c.1511T>A (p.M504K) | -24                           | Likely pathogenic (7 pts)      | Damaging (0.00)   | Probably damaging (0.948) | Deleterious (0.951) | SAV (0.7)                           | ↑         | 26.1                     | New acceptor/donor ss                           | No effect (<0,2)              | No          |
| 9    | c.1516G>A (p.G506R) | -19                           | Likely pathogenic (7 pts)      | Damaging (0.01)   | Probably damaging (1.00)  | Deleterious (0.960) | SAV (0.67)                          | ↑         | 29.9                     | New acceptor/donor ss                           | No effect (<0,2)              | No          |
| 9    | c.1517G>A (p.G506E) | -18                           | Likely pathogenic (7 pts)      | Damaging (0.00)   | Probably damaging (0.999) | Deleterious (0.960) | SNV (0.24)                          | ↑         | 27.6                     | New acceptor ss                                 | 0,00                          | No          |
| 9    | c.1534G>C (p.G512R) | -2                            | Pathogenic (10 pts)            | Damaging (0.01)   | Probably damaging (1.00)  | Deleterious (0.928) | SAV (0.8)                           | ↑         | 33                       | Donor site inactivated                          | No effect (<0,2)              | No          |



|    |                        |      |                        |                    |                                 |                        |            |    |      |                       |                         |    |
|----|------------------------|------|------------------------|--------------------|---------------------------------|------------------------|------------|----|------|-----------------------|-------------------------|----|
| 10 | c.1535G>A<br>(p.G512D) | +1   | Pathogenic<br>(13 pts) | Damaging<br>(0.02) | Probably<br>damaging<br>(0.999) | Deleterious<br>(0.931) | SAV (0.81) | ↑  | 32   | No splicing<br>impact | No effect<br>(<0,2)     | No |
| 10 | c.1537G>A<br>(p.G513R) | +3   | Pathogenic<br>(14 pts) | Damaging<br>(0.02) | Likely<br>damaging<br>(0.714)   | Deleterious<br>(0.911) | SAV (0.80) | -- | 29.5 | New<br>acceptor ss    | Acceptor<br>gain (0.22) | No |
| 10 | c.1639T>C<br>(p.W547R) | +105 | Pathogenic (11<br>pts) | Damaging<br>(0.00) | Probably<br>damaging<br>(0.998) | Deleterious<br>(0.932) | SAV (0.81) | -- | 27.6 | No splicing<br>impact | 0,00                    | No |

ESE, Exonic Splicing Enhancer; ESS, Exonic Splicing Silencer; (--) Not determined; SAV, Splicing Affecting Variant; SNV, Splicing Neutral Variant; PSI, Percentage of transcripts with the exon spliced in; PSI, Percentage of transcripts with the exon spliced in. ↑, higher the percentage of transcripts with the exon spliced in. ↓, lower the percentage of transcripts with the exon spliced in.

- Position in relation to the acceptor (+) or donor (-) splice site (SS).
- The general score of MutPredSplice ranges from 0.0 and 1.0, with a higher score indicating a greater propensity to be pathogenic.
- CADD-splice score equal or higher than 20 indicates that the variant is damaging.
- SpliceAI scores range from 0 to 1 and represent the probability that the variant affects splicing. Scores  $\geq 0,2$  (low);  $\geq 0,5$  (recommended);  $\geq 0,8$  (high precision). Only specific scores higher than 0.2 are shown.

**Table S5. Generation of ESSs in *CLCN5* exon 10 by mutations c.1535G>A, c.1537G>A, c. 1639T>G, c. 1639T>C and c.1641G>T, according to the bioinformatics tool HSF.**

| Position | ESS           | WT sequence | mt c.1535G>A sequence  | WT CV | c.1535G>A CV | $\Delta$ CV |
|----------|---------------|-------------|------------------------|-------|--------------|-------------|
| 1        | Sironi_motif1 | --          | GCAGaTGG               | NP    | 62,20        | Novo        |
| 1        | Sironi_motif2 | --          | AGaTGGG                | NP    | 82,65        | Novo        |
| 1        | ESS_hnRNPA1   | --          | GaTGGG                 | NP    | 66,79        | Novo        |
| 1        | Sironi_motif2 | --          | GaTGGGG                | NP    | 80,51        | Novo        |
| Position | ESS           | WT sequence | mt c.1537G>A sequence  | WT CV | c.1537G>A CV | $\Delta$ CV |
| 1        | Sironi_motif2 | --          | GTaGGGT                | NP    | 64,4         | Novo        |
| 2        | Sironi_motif2 | TGGGGTG     | --                     | 71,04 | NP           | None        |
| 2        | ESS_hnRNPA1   | --          | TaGGGT                 | NP    | 99,41        | Novo        |
| Position | ESS           | WT sequence | mt c. 1639T>G sequence | WT CV | c.1639T>G CV | $\Delta$ CV |
| 100      | Sironi_motif2 | --          | GCAAGgG                | NP    | 62,31        | Novo        |
| 101      | ESS_hnRNPA1   | --          | CAAGgG                 | NP    | 65,13        | Novo        |
| 101      | Sironi_motif2 | --          | CAAGgGG                | NP    | 70,66        | Novo        |
| 101      | Sironi_motif1 | CAAGTGGG    | CAAGgGGG               | 75,17 | 75,17        | 0           |
| 102      | ESS_hnRNPA1   | AAGTGG      | AAGgGG                 | 67,03 | 82,27        | -15,24      |
| 102      | Sironi_motif2 | --          | AAGgGGG                | NP    | 64,21        | Novo        |
| 102      | Sironi_motif1 | --          | AAGgGGGT               | NP    | 61,16        | Novo        |
| 103      | Sironi_motif2 | AGTGGGT     | AGgGGGT                | 81,60 | 69,06        | 12,54       |
| 104      | Sironi_motif2 | --          | GgGGGTG                | NP    | 67,96        | Novo        |
| 105      | Sironi_motif2 | TGGGTGG     | gGGGTGG                | 71,04 | 67,96        | 3,08        |
| Position | ESS           | WT sequence | mt 1639T>C sequence    | WT CV | 1639T>C CV   | $\Delta$ CV |
| 101      | Sironi_motif1 | CAAGTGGG    | CAAGcGGG               | 75,17 | 75,17        | 0           |
| 102      | ESS_hnRNPA1   | AAGTGG      | AAGcGG                 | 67,03 | 67,03        | 0           |
| 103      | Sironi_motif2 | AGTGGGT     | AGcGGGT                | 81,60 | 69,06        | 12,54       |
| 105      | Sironi_motif2 | TGGGTGG     | cGGGTGG                | 71,04 | 61,17        | 9,87        |

| Position | ESS           | WT sequence | mt c.1641G>T sequence | WT CV | c.1641G>T CV | ΔCV    |
|----------|---------------|-------------|-----------------------|-------|--------------|--------|
| 101      | Sironi_motif1 | CAAGTGGG    | CAAGTGtG              | 75,17 | 61,64        | 13,54  |
| 102      | ESS_hnRNPA1   | AAGTGG      | --                    | 67,03 | NP           | None   |
| 103      | Sironi_motif2 | AGTGGGT     | AGTGtGT               | 81,60 | 64,69        | -1,87  |
| 105      | Sironi_motif2 | TGGGTGG     | TGtGTGG               | 71,04 | 83,58        | -16,19 |
| 106      | Sironi_motif2 | GGGTGGC     | --                    | 66,88 | NP           | None   |
| 107      | Sironi_motif2 | GGTGGCA     | tGTGGCA               | 69,67 | 72,75        | -12,54 |

WT, exon 10 wild-type motif sequence; mt, exon 10 mutated motif sequence; mutant nucleotides are in small letters; --, motif not observed; CV, consensus values from Human Splicing Finder (the higher the score, the higher the confidence that the corresponding trans-acting factors recognize the site); ΔCV, WT CV – Mutant CV (If differences are negative, the ESS confidence is higher in mutation); NP, CV not present; None, no CV differences; *Novo*, ESS motifs only observed in mutated sequence

c.1535G>A

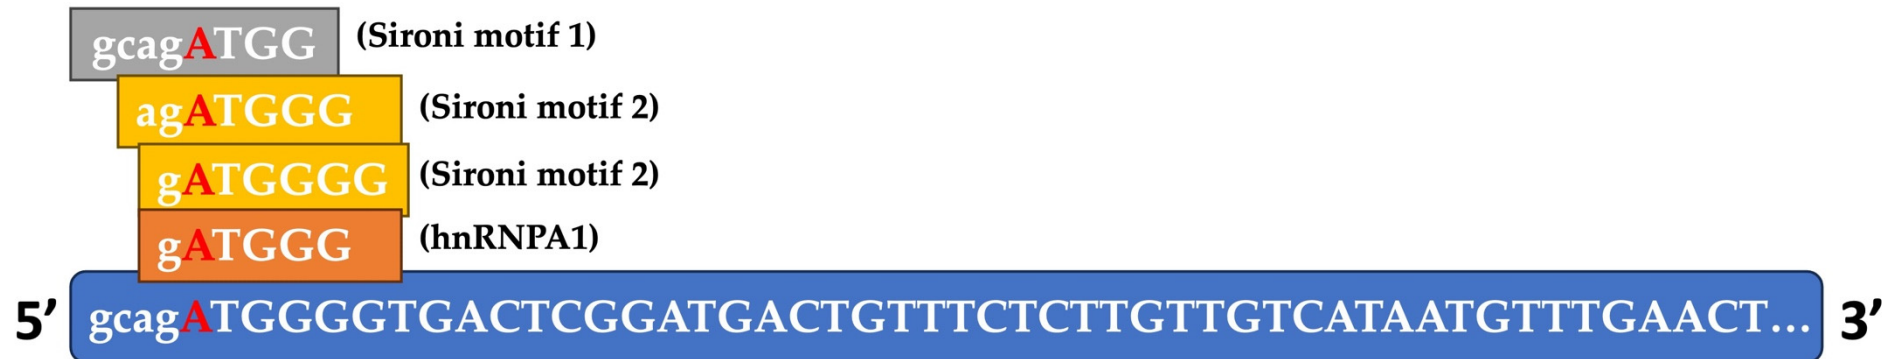

c.1537G>A

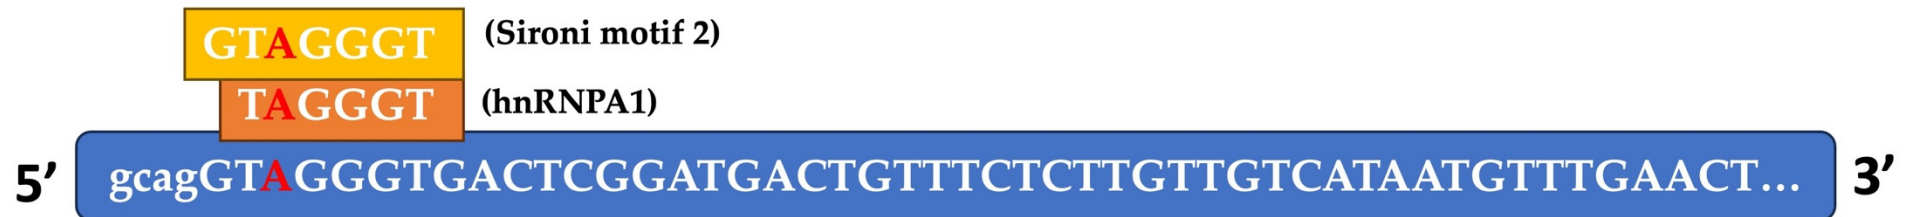

c.1639T>G (Ramos-Trujillo et al., 2007)

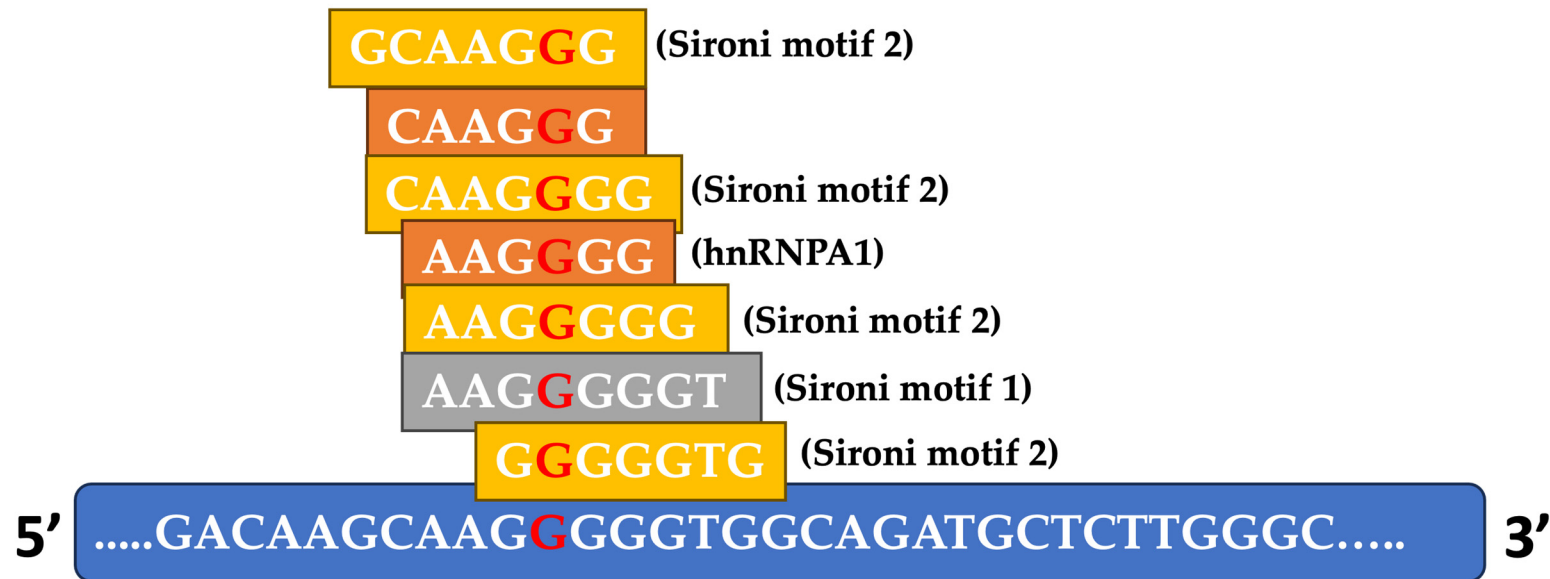

c.1641G>T

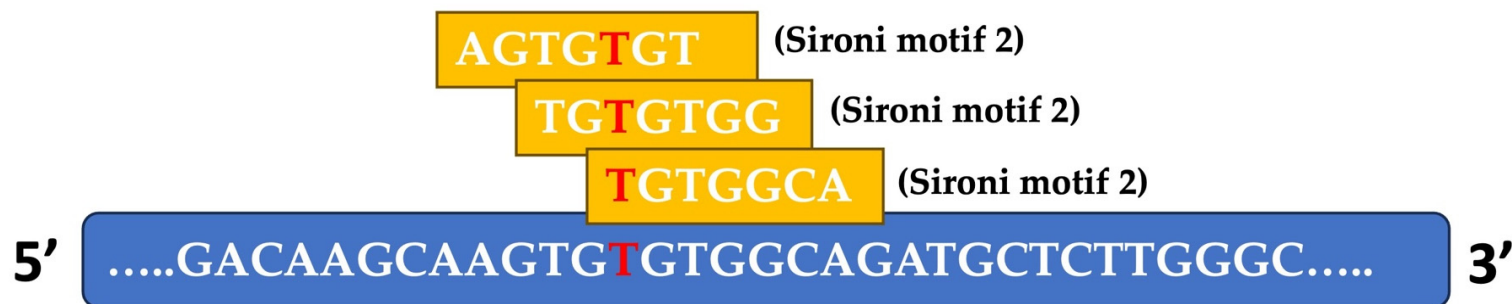

Figure S1. Schematic representation of ESSs generation by exón 10 *CLCN5* mutations c.1535G>A, c.1537G>A, c. 1639T>G, c. 1639T>C and c.1641G>T, according to the bioinformatics tool HSF.

Intron sequences are in small letters and exon sequences in capital letters; ESSs showed are novo sequences or with negative  $\Delta CV$ . Sironi motif 1, are marked with a gray box; Sironi motif 2, are marked with a yellow box; hnRNPA1 motif are marked with orange box.
